# Supplementary material
Source: PubMed Central journal article supplement (PMC1299218)
Supplement: 6-7400301-s1.pdf [file 6-7400301-s1.pdf]

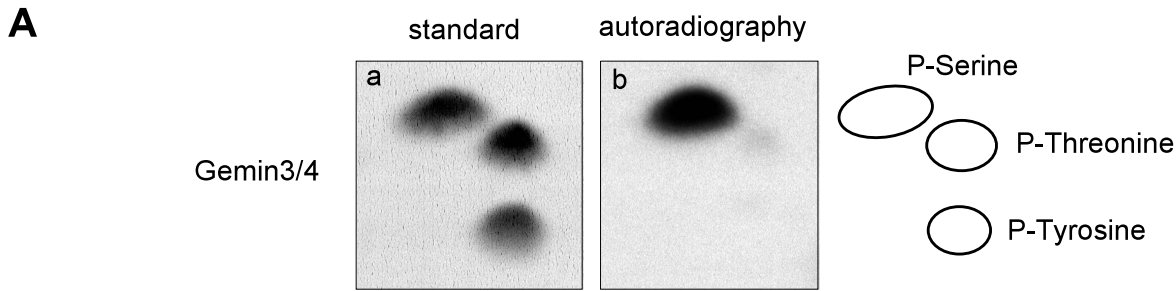

**Fig. A. Phosphorylation of a 100kDa-component of the SMN-complex.**

Phospho-amino acid analysis of the 100kDa-protein. The [32P]-phosphate labelled proteins from Fig. 1A were transferred to a PVDF-membrane, excised and hydrolysed in HCl. The amino acids were mixed with a phospho-amino acids standard and were separated by 2D-TLC. Autoradiography (panel b) was compared with the position of ninhydrin stained standard phospho-amino acids (left panel, a). Asterisks denote partially hydrolysed protein.

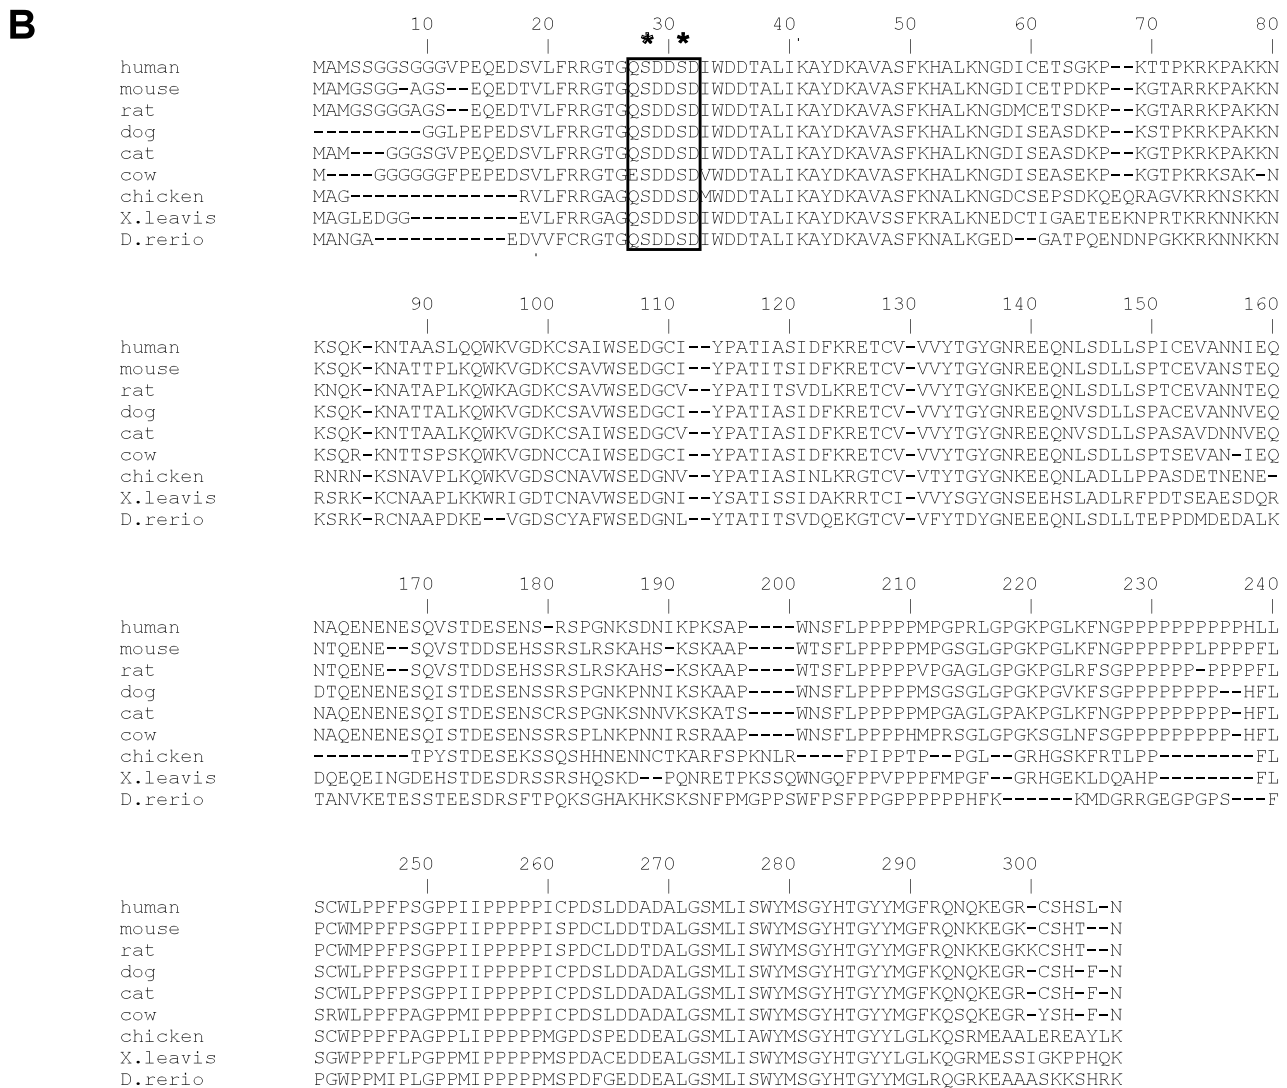

**Fig. B. The Phospho-serines in the QSDSD-motif of SMN are located in a region conserved among higher eucaryotes.**

Sequence-alignment of SMN from different species. The consensus motif of SMN is boxed. Phosphorylated serines in human SMN are indicated by an asterisk.

**C**

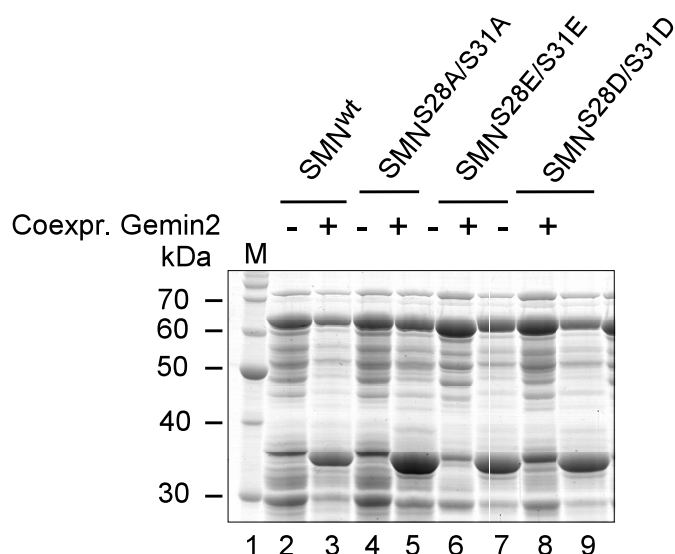

**Fig. C. Phosphorylation of serine 28 and 31 in SMN does not affect binding to Gemin2 *in vitro*.**

Full length human SMN and mutated forms thereof were subcloned into the pGEX 5X-1 vector and cotransfected in *E. coli* BL21 DE3 with Gemin2, subcloned in pET28a-vector. Protein induction was carried out in superbrot medium, containing ampicilin and kanamycin, with 1mM IPTG for 6h at 16°C. Bacteria were harvested by centrifugation and resuspended in extraction buffer (300mM NaCl, 50mM Tris/HCl pH 7.5, 1mM DTT, 5mM EDTA, 5mM EGTA, 0,1% Igepal and protease inhibitors Leupeptin, PepstatinA, Aprotinin (10µg/ml each) and AEBSF (0.1mM). GST-SMN fusion proteins were purified with glutathion-sepharose beads as described by the manufacturer. Lanes 2, 4, 6 and 8 show expression of SMN without Gemin2, lanes 3, 5, 7 and 9 show coexpression of SMN and Gemin2.

**D**

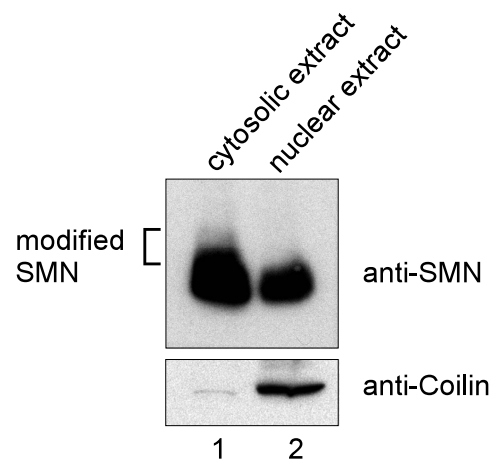

**Fig. D. Compartment-specific phosphorylation of SMN.**

Cytosolic (lane 1) and nuclear HeLa extracts (lane 2) were separated by SDS-PAGE and analysed by western blotting using 7B10 monoclonal SMN-antibody (upper panel). Extracts were blotted in parallel with anti-Coilin antibody (clone 56, BD Transduction Laboratories, lower panel) to monitor the purity of the obtained extracts.

**E**

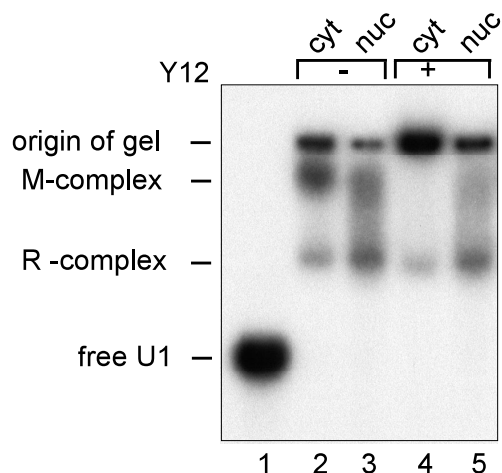

**Fig. E. HeLa extract from the cytosol, but not from the nucleus is active in U snRNP assembly.**

[<sup>32</sup>P]-labelled U1 snRNA was incubated with either HeLa cytosolic (lane 2) or nuclear (lane 3) extract. Assembly was analysed by native gel electrophoresis. Lane 4 shows incubation of cytosolic, lane 5 of nuclear assembly reaction with Y12 anti Sm-antibody.

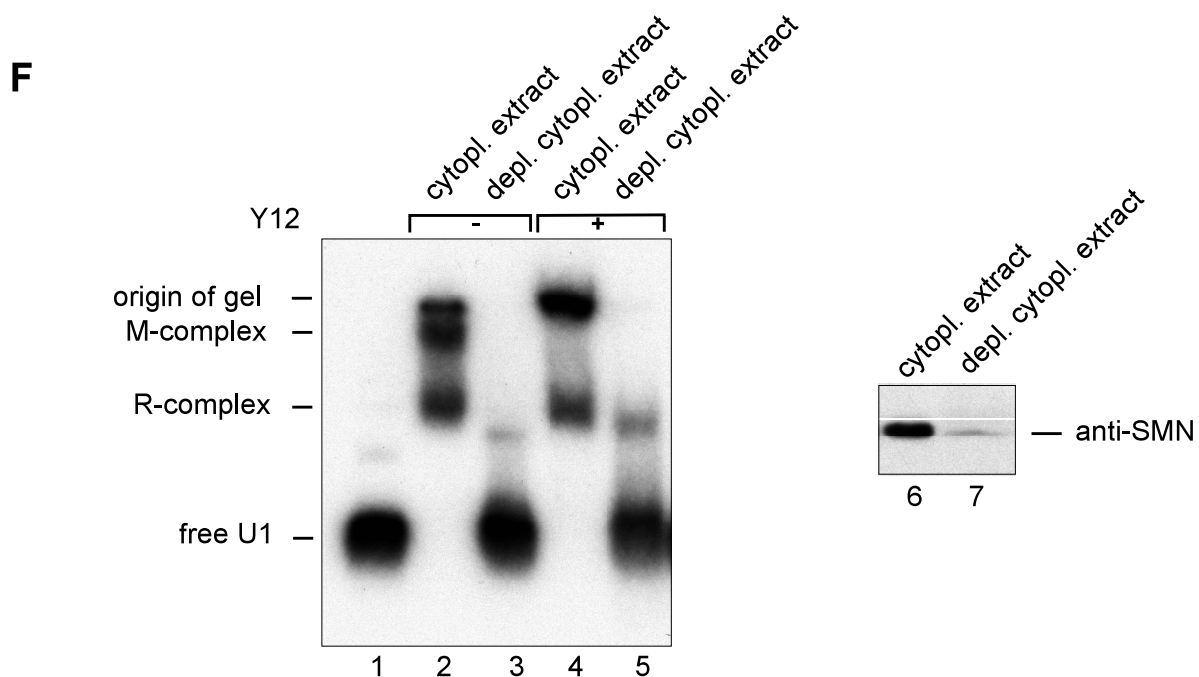

**Fig. F. Cytosolic HeLa extract, depleted from SMN is inactive in U snRNP assembly.**

[<sup>32</sup>P]-labelled U1 snRNA was incubated with same amounts of either HeLa cytosolic (lane 2) or SMN depleted HeLa cytosolic (lane 3) extract. Assembly was analysed by native gel electrophoresis. Lane 4 and 5 show incubation of both assembly reaction with Y12 anti Sm-antibody. Right panel shows western blot analysis with monospecific anti-SMN antibody of cytosolic HeLa extract (lane 6) and SMN depleted cytosolic extract.
